# Supplementary material for: Chronic Kirschsteiniothelia infection superimposed on a pre-existing non-infectious bursitis of the ankle: the first case report of human infection
Source: Springer Nature journal article supplement (doi:10.1186/s12879-018-3152-3), 2018-05-22

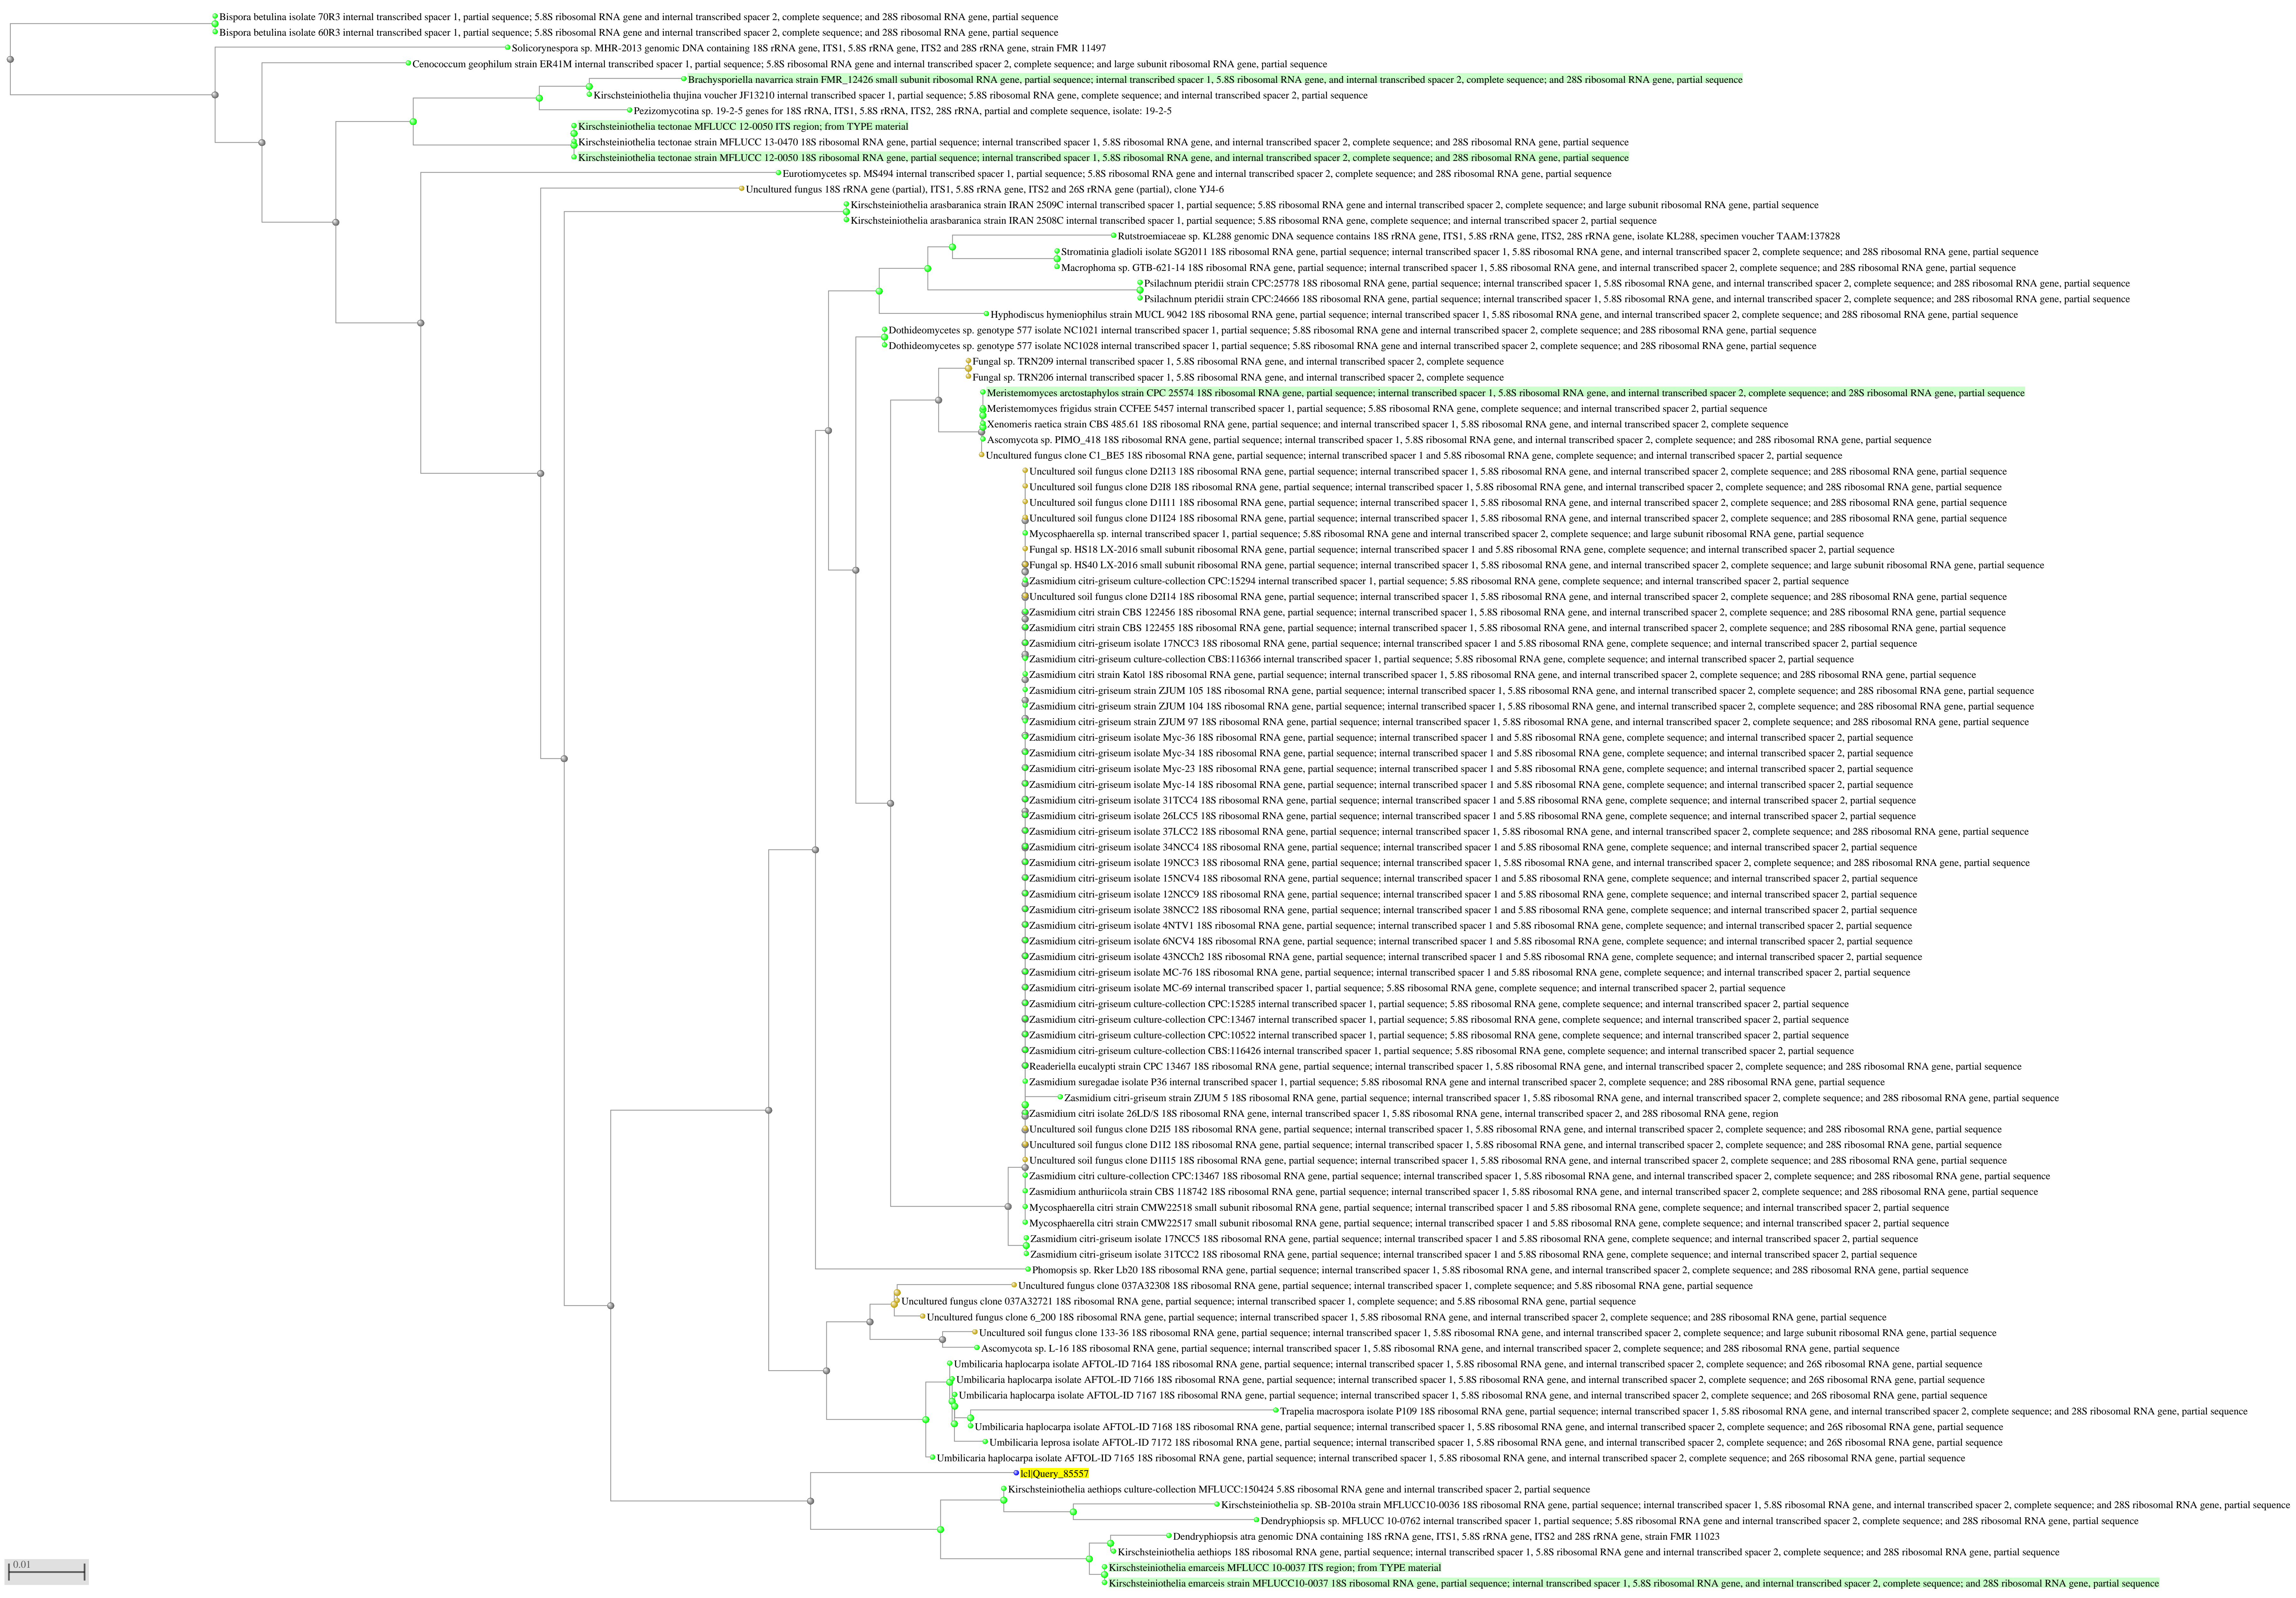

Supplement: MOESM2 [file 15782122]
